# Supplementary material for: Stochastic tuning of gene expression enables cellular adaptation in the absence of pre-existing regulatory circuitry
Source: eLife journal article supplement (doi:10.7554/elife.31867), 2018-04-05
Supplement: supp [file elife-31867-supp-v1.zip]

---

| Primer pair | Forward sequence               | Reverse sequence            | Target | 5' end | 3' end |
|-------------|--------------------------------|-----------------------------|--------|--------|--------|
| URA3        | ATGTCGAAAGCTACAT<br>ATAAGGAACG | GGTGGTACGAACATCC<br>AATGA   | URA3   | 1      | 123    |
| DHFR        | ATGGTTCGACCATTGA<br>ACTGC      | CACTGAAGAGGTTGTG<br>GTCATTC | mDHFR  | 1      | 133    |

---
