# Supplementary material for: Stochastic tuning of gene expression enables cellular adaptation in the absence of pre-existing regulatory circuitry
Source: eLife journal article supplement (doi:10.7554/elife.31867), 2018-04-05
Supplement: supp [file elife-31867-supp-v1.zip]

| <b>Parameter</b>      | <b>Description</b>              | <b>Value</b> |
|-----------------------|---------------------------------|--------------|
| $p_{\text{timestep}}$ | T mark addition probability     | 1            |
| $n_{\text{window}}$   | Timesteps for fitness averaging | 200          |
| $p_{\text{decay}}$    | T mark decay probability        | 0.001        |
| $p_{\text{random}}$   | Random T mark probability       | 0.1          |
| $\mu_{\text{max}}$    | Maximum number of T marks       | 10           |
| $p_{\text{s\_mark}}$  | S mark addition probability     | 0.005        |
| $m_{\text{s}}$        | S mark effect size              | 0.01         |
