# Supplementary material for: Stochastic tuning of gene expression enables cellular adaptation in the absence of pre-existing regulatory circuitry
Source: eLife journal article supplement (doi:10.7554/elife.31867), 2018-04-05
Supplement: supp [file elife-31867-supp-v1.zip]

| Promoter           | Replicate 1   |                              |                                                      | Replicate 2   |                              |                                                      | Baseline |
|--------------------|---------------|------------------------------|------------------------------------------------------|---------------|------------------------------|------------------------------------------------------|----------|
|                    | <i>SC+glu</i> | <i>ura-/6A</i><br><i>U15</i> | <i>Fraction</i><br><i>forming</i><br><i>colonies</i> | <i>SC+glu</i> | <i>ura-/6A</i><br><i>U15</i> | <i>Fraction</i><br><i>forming</i><br><i>colonies</i> |          |
| P <sub>RG11</sub>  | 66            | 0                            | <0.015                                               | 92            | 0                            | <0.011                                               | 0.0002   |
| P <sub>HSP12</sub> | 189           | 14                           | 0.074                                                | 98            | 5                            | 0.051                                                | 0.15     |
| synprom            | 256           | 0                            | <0.004                                               | 85            | 0                            | <0.012                                               | 0.0006   |
