# Supplementary material for: Stochastic tuning of gene expression enables cellular adaptation in the absence of pre-existing regulatory circuitry
Source: eLife journal article supplement (doi:10.7554/elife.31867), 2018-04-05
Supplement: supp [file elife-31867-supp-v1.zip]

| ID | URA3 promoter | DHFR promoter | Media        | Average genomic coverage | Average chromosome III coverage | Average URA3 insert coverage | URA3 sequence variants                     | Average DHFR insert coverage | DHFR sequence variants |
|----|---------------|---------------|--------------|--------------------------|---------------------------------|------------------------------|--------------------------------------------|------------------------------|------------------------|
| C1 | synprom       | ADH1          | 6AU15 plate  | 14.4x                    | 14.9x                           | 15.3x                        | None                                       | 15.4x                        | None                   |
| C2 | synprom       | ADH1          | 6AU15 plate  | 10.9x                    | 11.0x                           | 11.8x                        | Synprom SNP (~30%), URA3 early stop (~30%) | 10.4x                        | None                   |
| C3 | synprom       | ADH1          | 6AU 15 plate | 25.2x                    | 15.6x                           | 31.3x                        | None                                       | 14.2x                        | None                   |
| C4 | synprom       | ADH1          | 6AU15 plate  | 13.2x                    | 11.6x                           | 10.6x                        | None                                       | 16.0x                        | None                   |
| L1 | synprom       | ADH1          | Liquid 6AU5  | 30.6x                    | 31.5x                           | 33.7x                        | None                                       | 39.6x                        | None                   |
| L2 | synprom       | ADH1          | Liquid 6AU5  | 6.8x                     | 7.0x                            | 8.5x                         | None                                       | 8.5x                         | None                   |
| L3 | synprom       | synprom       | Liquid 6AU5  | 25.5x                    | 27.4x                           | 28.9x                        | None                                       | 25.9x                        | None                   |
| L4 | synprom       | synprom       | Liquid 6AU5  | 8.7x                     | 8.3x                            | 7.9x                         | S->A in URA3-m Ruby linker (~40%)          | 8.7x                         | T->A in DHFR (~30%)    |
