# Supplementary material for: Stochastic tuning of gene expression enables cellular adaptation in the absence of pre-existing regulatory circuitry
Source: eLife journal article supplement (doi:10.7554/elife.31867), 2018-04-05
Supplement: supp [file elife-31867-supp-v1.zip]

---

| <b>Overlap</b> | <b>SC+glu</b>        | <b>6AU10</b>            |
|----------------|----------------------|-------------------------|
| Top-Full       | 72.7 (42.4 - 256.0)  | 1172.8 (903.0 - 1673.1) |
| Top-Bottom     | 90.4 (60.2 - 181.5)  | 961.5 (799.5 - 1205.9)  |
| Bottom-Full    | 101.4 (77.1 - 148.2) | 370.5 (252.2 - 697.7)   |

---
